# Supplementary material for: Dubowitz Syndrome Is a Complex Comprised of Multiple, Genetically Distinct and Phenotypically Overlapping Disorders
Source: PLoS One. 2014 Jun 3;9(6):e98686. doi: 10.1371/journal.pone.0098686 (PMC4043752; doi:10.1371/journal.pone.0098686)
Supplement: Table S1 — List of primers for Sanger sequencing of LIG4 . (XLSX) [file pone.0098686.s002.xlsx]

## Sheet: Sheet1
	Supporting Table 1. List of primers for Sanger sequencing of LIG4
A		Mutation 1 (tested with primers 228, 234 and 2025)	Mutation 2 (tested with primers 192, 240 and 2025)
	Control	228, 234, 2025	240, 2025
	Patient 1	228, 234, 2025	192, 240
	Patient 2	228, 234, 2025	192, 240
	Mutation 1: Chr13:108,863,104 delA (delT on the complementary strand)
	Mutation 2: Chr13:108,861,177 G>A (C>T on the complementary strand)
B	Primer name	Primer sequence
	228_F	TGCCAGCAATAATTCTGCTAA
	228_R	GGATCATGCAGTTGCCTACA
	234_F	TCAGAGTTCAGCACTTGAGCA
	234_R	GCAATAGCAGCTAGCATTGGTT
	2025_F	TCAGAGTTCAGCACTTGAGCA
	2025_R	TTTGCTCCATGAAACCGAAG
	192_F	ACGAGCAGACTCCTGAAGAAA
	192_R	CATGAAACCGAAGCTCCAAG
	240_F	CAGACTTGAACCAACTGAAGGA
	240_R	CATGAAACCGAAGCTCCAAG
